# Supplementary material for: The Effect of CuO on the Thermal Behavior of the High-Energy Combustion Agent of the Al/MnO2 System
Source: Hindawi journal article supplement (doi:10.1155/2019/4536268), 2019-04-03
Supplement: f1 [file 4536268.f1.xlsx]

## Sheet: Sheet1
Numb.	Al-wt-%	MnO2-wt-%	CuO-wt-%
1	29.2692	70.7308	0
2	28.5935	66.3168	5.08968
3	27.9543	62.0924	9.95328
4	27.2927	57.77	14.9374
5	26.6188	53.4635	19.9177
2Al + 1.5MnO2 = Al2O3 + 1.5Mn
T	deltaH	deltaS	deltaG	K	Log(K)
K	kJ	J/K	kJ
0.001	-2.93488e+06	-1.46701e+12	-1.46787e+06	1e+308	308
100	-897.975	-84.0869	-889.567	1e+308	308			#NAME?
200	-891.75	-33.8419	-884.982	1.42177e+231	231.153
300	-892.566	-36.9275	-881.488	3.11533e+153	153.494
400	-893.77	-40.4137	-877.604	4.10079e+114	114.613
500	-894.444	-41.9442	-873.472	1.81393e+91	91.2586
600	-894.603	-42.2444	-869.256	4.80563e+75	75.6818
700	-894.509	-42.1008	-865.038	3.59172e+64	64.5553
800	-894.563	-42.1687	-860.828	1.6256e+56	56.211
900	-894.727	-42.3596	-856.603	5.2493e+49	49.7201
1000	-912.778	-61.8781	-850.9	2.8195e+44	44.4502
1100	-912.488	-61.6019	-844.726	1.30625e+40	40.116
1200	-912.129	-61.2899	-838.581	3.20276e+36	36.5055
1300	-911.716	-60.9598	-832.469	2.82996e+33	33.4518
1400	-907.843	-58.1141	-826.484	6.90317e+30	30.839
1500	-903.666	-55.181	-820.894	3.87668e+28	28.5885
1600	-882.877	-41.514	-816.455	4.53663e+26	26.6567
1700	-881.495	-40.6756	-812.346	9.17129e+24	24.9624
1800	-880.161	-39.9131	-808.317	2.87545e+23	23.4587
1900	-878.882	-39.2214	-804.361	1.30396e+22	22.1153
2000	-877.664	-38.5965	-800.471	8.08887e+20	20.9079
2100	-876.512	-38.0345	-796.64	6.56107e+19	19.817
2200	-875.432	-37.5321	-792.862	6.70654e+18	18.8265
2300	-874.43	-37.0864	-789.131	8.37966e+17	17.9232
2400	-758.522	12.6944	-788.988	1.49045e+17	17.1733
2500	-752.387	15.199	-790.384	3.27759e+16	16.5156
2600	-746.389	17.5515	-792.023	8189674818115644	15.9133
2700	-740.528	19.7636	-793.89	2.2909e+15	15.36
2800	-734.804	21.8456	-795.972	7.08384e+14	14.8503
2900	-729.216	23.8066	-798.255	2.39511e+14	14.3793
3000	-723.764	25.655	-800.729	8.77192e+13	13.9431
Al		Extrapolated from		2790	K
MnO2		Extrapolated from		800	K
Formula	FM	Conc.	Amount	Amount	Volume
	g/mol	wt-%	mol	g	l or ml
Al	26.9815	29.2692	2	53.9631	19.9863	ml
MnO2	86.9368	70.7308	1.5	130.405	25.6703	ml
	g/mol	wt-%	mol	g	l or ml
Al2O3	101.961	55.303	1	101.961	25.7153	ml
Mn	54.938	44.697	1.5	82.407	11.0911	ml
